# Supplementary material for: Prevalence and associated factors of shisha smoking among students in Senegal: Global Youth Tobacco Survey 2020
Source: PubMed Central journal article supplement (PMC11091866; doi:10.18332/tid/186656), 2024-05-14
Supplement: TID-22-77-s1.pdf [file TID-22-77-s1.pdf]

**Supplementary Table 1: The prevalence of ever and current shisha smoking among Senegalese students, 2020 Global Youth Tobacco Survey (n= 2524)**

| Variable                                                          | Boys (n=1111)      |                       | Girls (1389)       |                       |
|-------------------------------------------------------------------|--------------------|-----------------------|--------------------|-----------------------|
|                                                                   | Ever use of shisha | Current use of shisha | Ever use of shisha | Current use of shisha |
|                                                                   | % (95% CI)         | % (95% CI)            | % (95% CI)         | % (95% CI)            |
| <b>Class grade</b>                                                |                    |                       |                    |                       |
| 6 <sup>e</sup> me (grade 7)                                       | 12.3(7.2-20.2)     | 2.8(0.7-10.0)         | 5.3(3.0-9.4)       | 1.4(0.8-2.4)          |
| 5 <sup>e</sup> me (grade 8)                                       | 12.7(9.2-17.2)     | 21.(1.0-4.0)          | 6.7(4.2-10.6)      | 1.1(0.4-2.7)          |
| 4 <sup>e</sup> me (grade 9)                                       | 9.8(5.6-16.7)      | 1.6(0.7-3.4)          | 6.0(3.3-10.8)      | 0.5(0.2-1.8)          |
| 3 <sup>e</sup> me (grade 10)                                      | 24.8(12.1-44.2)    | 9.0(3.7-20.1)         | 14.9(9.3-23.1)     | 5.5(2.5-11.9)         |
|                                                                   | <b>p = 0.125</b>   | <b>p = 0.0373</b>     | <b>p=0.041</b>     | <b>p&lt;0.001</b>     |
| <b>Average weekly pocket money</b>                                |                    |                       |                    |                       |
| Usually don't have any money                                      | 9.6(6.8-13.2)      | 2.7(1.1-6.4)          | 4.5(2.5-8.5)       | 0.2(0.2-0.3)          |
| Less than 2500 CFA Francs (\$4.21) <sup>a</sup>                   | 13.6(10.8-17.0)    | 2.6(1.4-4.8)          | 6.1(4.3-8.5)       | 1.7(1.1-2.5)          |
| 2500–5000 CFA (\$4.21–8.43) <sup>a</sup>                          | 17.9(9.5-31.3)     | 2.6(0.8-7.7)          | 10.6(6.1-17.9)     | 0                     |
| More than 5000 CFA (\$8.43) <sup>a</sup>                          | 32.1(13.3-59.2)    | 9.5(3.3-24.2)         | 18.7(10.4-31.4)    | 8.4(3.8-17.5)         |
|                                                                   | <b>p = 0.018</b>   | <b>P = 0.130</b>      | <b>p&lt;0.001</b>  | <b>p&lt;0.001</b>     |
| <b>Parent's working status</b>                                    |                    |                       |                    |                       |
| Neither                                                           | 12.3(5.2-26.5)     | 3.6(1.2-10.3)         | 8.2(4.5-14.5)      | 1.4(0.9-2.2)          |
| Father, stepfather, or mother's partner only                      | 11.7(7.0-18.9)     | 2.9(1.1-7.1)          | 5.4(2.9-9.9)       | 1.2(0.6-2.5)          |
| Mother, stepmother, or father's partner only                      | 10.4(5.8-18.0)     | 2.6(0.8-8.7)          | 9.1(4.5-17.4)      | 1.4(0.4-4.5)          |
| Both                                                              | 14.8(10.9-19.7)    | 2.7(1.6-4.5)          | 7.0(4.8-14.5)      | 1.4(0.9-2.2)          |
|                                                                   | <b>p = 0.737</b>   | <b>p = 0.648</b>      | <b>p = 0.647</b>   | <b>p = 0.890</b>      |
| <b>Cigarette smoking status</b>                                   |                    |                       |                    |                       |
| Never smoked cigarettes                                           | 8.5(6.5-11.0)      | 1.2(0.7-2.1)          | 5.4(3.7-7.9)       | 0.8(0.5-1.4)          |
| Ever tried cigarette smoking but not currently smoking cigarettes | 30.2(18.0-46.0)    | 7.1(2.9-16.7)         | 18.9(11.4-29.7)    | 4.1(1.2-12.9)         |
| Currently smoking cigarettes                                      | 45.9(32.3-60.2)    | 23.5(12.2-40.5)       | 72.7(35.3-92.8)    | 33.9(9.6-71.2)        |
|                                                                   | <b>p&lt;0.001</b>  | <b>p&lt;0.001</b>     | <b>p&lt;0.001</b>  | <b>p&lt;0.001</b>     |
| <b>Current use of smokeless tobacco</b>                           |                    |                       |                    |                       |
| No                                                                | 11.8(9.0-15.3)     | 2.8(1.7-4.8)          | 5.2(4.5-8.2)       | 1.1(0.7-1.8)          |
| Yes                                                               | 43.3(27.6-60.5)    | 15.8(6.5-33.7)        | 35.6(19.0-56.1)    | 0                     |
|                                                                   | <b>p&lt;0.001</b>  | <b>p&lt;0.001</b>     | <b>p&lt;0.001</b>  | <b>p = 0.5204</b>     |
| <b>Exposure to SHS at home</b>                                    |                    |                       |                    |                       |
| No                                                                | 10.4(7.8-13.6)     | 2.0(1.1-3.6)          | 5.7(4.2-7.7)       | 0.8(0.4-1.5)          |
| Yes                                                               | 30.7(19.4-45.0)    | 8.0(3.6-16.7)         | 14.3(7.7-25.1)     | 4.8(2.0-11.1)         |
|                                                                   | <b>p&lt;0.001</b>  | <b>p = 0.001</b>      | <b>p = 0.004</b>   | <b>p = 0.001</b>      |
| <b>Exposure to SHS in public places</b>                           |                    |                       |                    |                       |

| Variable                               | Boys (n=1111)      |                       | Girls (1389)       |                       |
|----------------------------------------|--------------------|-----------------------|--------------------|-----------------------|
|                                        | Ever use of shisha | Current use of shisha | Ever use of shisha | Current use of shisha |
|                                        | % (95% CI)         | % (95% CI)            | % (95% CI)         | % (95% CI)            |
| No                                     | 9.6(7.0-13.1)      | 2.0(1.0-4.1)          | 4.4(3.0-6.4)       | 0.4(0.1-1.2)          |
| Yes                                    | 19.3(14.1-25.9)    | 4.6(2.8-7.6)          | 11.3(7.1-17.5)     | 3.2(1.76.0)           |
|                                        | <b>p = 0.001</b>   | <b>p = 0.008</b>      | <b>P=0.002</b>     | <b>P = 0.002</b>      |
| <b>Parent's smoking status</b>         |                    |                       |                    |                       |
| Neither                                | 11.63(8.3-16.0)    | 2.2(1.0-4.7)          | 5.8(3.9-8.5)       | 0.6(0.4-1.0)          |
| Both                                   | 14.62(6.8-28.5)    | 3.5(0.9-12.0)         | 9.9(3.2-26.4)      | 3.3(0.7-14.6)         |
| Father only                            | 20.5(12.5-31.7)    | 6.7(2.8-15.0)         | 13.8(7.5-24.0)     | 6.2(2.6-14.2)         |
| Mother only                            | 43.6(8.0-87.4)     | 0                     | 0                  | 0                     |
|                                        | p = 0.099          | p = 0.163             | p=0.183            | <b>p = 0.004</b>      |
| <b>Closest friends' smoking status</b> |                    |                       |                    |                       |
| None of them                           | 11.3(8.9-14.1)     | 2.0(1.1-3.5)          | 6.2(4.4-8.4)       | 1.1(0.6-1.8)          |
| Some of them                           | 22.7(14.9-33.0)    | 8.2(4.7-13.9)         | 12.6(5.9-25.1)     | 0.9(0.1-6.7)          |
| Most/all of them                       | 35.0(21.2-51.9)    | 11.7(3.0-36.5)        | 33.5(13.2-62.5)    | 16.3(5.3-40.5)        |
|                                        | <b>p&lt;0.001</b>  | <b>p = 0.001</b>      | <b>p&lt;0.001</b>  | <b>p&lt;0.001</b>     |

CI: confidence interval. OR: unadjusted odds ratio. AOR: adjusted odds ratio. CFA: West African Franc (Official currency of eight countries in West Africa). SHS: secondhand smoke.

Level of significance of regression results: \*p<0.05, \*\*p≤ 0.01, \*\*\* p≤ 0.001

<sup>a</sup> Using current OANDA Currency Converter. <https://www.oanda.com/currency-converter/en/?from=XOF&to=USD&amount=5000>

<sup>b</sup> Not shown because of small numbers.

**Supplementary Table 2: Factors associated with ever and current shisha smoking among Senegalese students, 2020 Global Youth Tobacco Survey (n= 2524)**

|                                                                   | Boys (n=1111)      |                       | Girls (1389)       |                       |
|-------------------------------------------------------------------|--------------------|-----------------------|--------------------|-----------------------|
|                                                                   | Ever use of shisha | Current use of shisha | Ever use of shisha | Current use of shisha |
|                                                                   | AOR (95% CI)       | AOR (95% CI)          | AOR (95% CI)       | AOR (95% CI)          |
| <b>Class grade</b>                                                |                    |                       |                    |                       |
| 6 <sup>e</sup> me (grade 7)                                       | Reference          | Reference             | Reference          | Reference             |
| 5 <sup>e</sup> me (grade 8)                                       | 1.1(0.5-2.6)       | 0.6(0.2-2.0)          | 1.4(0.5-3.8)       | 1.5(0.1-40.1)         |
| 4 <sup>e</sup> me (grade 9)                                       | 0.6(0.2-1.8)       | 0.5(0.1-2.1)          | 1.1(0.5-2.6)       | 5.4(0.3-92.9)         |
| 3 <sup>e</sup> me (grade 10)                                      | 2.1(1.0-4.6)       | 1.4(0.2-8.3)          | 3.2(1.2-8.7)*      | 23.2(1.7-324.8)**     |
| <b>Average weekly pocket money</b>                                |                    |                       |                    |                       |
| Usually don't have any money                                      | Reference          | Reference             | Reference          | Reference             |
| Less than 2500 CFA Francs (\$4.21) <sup>a</sup>                   | 3.4(1.8-6.2) ***   | 5.5(1.9-15.7) **      | 1.1(0.4-3.3)       | 24.8(0.4-1719.5)      |
| 2500–5000 CFA (\$4.21–8.43) <sup>a</sup>                          | 2.1(0.9-4.9)       | 2.6(0.3-20.4)         | 2.2(0.6-8.6)       | <sup>b</sup>          |
| More than 5000 CFA (\$8.43) <sup>a</sup>                          | 4.3(1.4-13.6) **   | 12.6(0.8-197.8)       | 2.3(0.6-9.8)       | 125.9(1.2-13217.60)*  |
| <b>Parent's working status</b>                                    |                    |                       |                    |                       |
| Neither                                                           | Reference          | Reference             | Reference          | Reference             |
| Father, stepfather, or mother's partner only                      | 0.8(0.3-2.5)       | 0.9(0.2-5.0)          | 0.6(0.2-1.9)       | 12.6(0.3-466.3)       |
| Mother, stepmother, or father's partner only                      | 0.4(0.1-1.3)       | <sup>b</sup>          | 0.5(0.2-1.8)       | 14.9(0.6-351.5)       |
| Both                                                              | 1.1(0.4-2.8)       | 0.6(0.1-4.0)          | 0.7(0.2-1.8)       | 3.2(0.4-26.7)         |
| <b>Cigarette smoking status</b>                                   |                    |                       |                    |                       |
| Never smoked cigarettes                                           | Reference          | Reference             | Reference          | Reference             |
| Ever tried cigarette smoking but not currently smoking cigarettes | 3.2(1.8-5.9) ***   | 3.3(1.3-8.7) *        | 5.7(1.8-17.8) **   | 20.5(2.8-147.4) **    |
| Currently smoking cigarettes                                      | 6.4(2.5-16.6) ***  | 25.1(4.1-155.3) ***   | 18.9(2.6-138.3) ** | 228.9(8.3-6309.9) **  |
| <b>Current use of smokeless tobacco</b>                           |                    |                       |                    |                       |
| No                                                                | Reference          | Reference             | Reference          | Reference             |
| Yes                                                               | 12.1(4.8-30.8) *** | 22.1(4.5-109.7) ***   | 16.4(4.4-61.5) *** | <sup>b</sup>          |
| <b>Exposure to SHS at home</b>                                    |                    |                       |                    |                       |
| No                                                                | Reference          | Reference             | Reference          | Reference             |
| Yes                                                               | 1.6(0.7-3.4)       | 1.3(0.2-7.7)          | 1.9(0.6-5.7)       | 7.7(0.8-72.8)         |
| <b>Exposure to SHS in public places</b>                           |                    |                       |                    |                       |
| No                                                                | Reference          | Reference             | Reference          | Reference             |
| Yes                                                               | 1.1(0.7-1.9)       | 0.5(0.1-2.0)          | 2.4(1.2-4.8)*      | 13.1(0.5-351.0)       |
| <b>Parent's smoking status</b>                                    |                    |                       |                    |                       |

|                                        | <b>Boys (n=1111)</b>      |                              | <b>Girls (1389)</b>       |                              |
|----------------------------------------|---------------------------|------------------------------|---------------------------|------------------------------|
|                                        | <b>Ever use of shisha</b> | <b>Current use of shisha</b> | <b>Ever use of shisha</b> | <b>Current use of shisha</b> |
|                                        | <b>AOR (95% CI)</b>       | <b>AOR (95% CI)</b>          | <b>AOR (95% CI)</b>       | <b>AOR (95% CI)</b>          |
| Neither                                | Reference                 | Reference                    | Reference                 | Reference                    |
| Both                                   | 1.2(0.4-3.7)              | 2.1(0.4-10.2)                | 0.6(0.2-1.7)              | 2.3(0.6-8.7)                 |
| Father only                            | 1.4(0.6-3.4)              | 2.9(0.8-10.0)                | 1.5(0.7-3.4)              | 14.4(2.1-98.8)               |
| Mother only                            | 2.2(0.1-76.0)             | <sup>b</sup>                 | <sup>b</sup>              | <sup>b</sup>                 |
| <b>Closest friends' smoking status</b> |                           |                              |                           |                              |
| None of them                           | Reference                 | Reference                    | Reference                 | Reference                    |
| Some of them                           | 1.9(1.0-3.6) *            | 3.8(1.2-12.5) *              | 0.7(0.2-2.0)              | <sup>b</sup>                 |
| Most/all of them                       | 1.5(0.4-5.6)              | 5.1(0.4-60.7)                | 3.0(0.4-22.0)             | 1.15(0.1-13.1)               |

N: unweighted sample. CI: confidence interval. OR: unadjusted odds ratio. AOR: adjusted odds ratio. CFA: West African Franc (Official currency of eight countries in West Africa). SHS: secondhand smoke.

Level of significance of regression results: \*p<0.05, \*\*p≤ 0.01, \*\*\* p≤ 0.001

a Using current OANDA Currency Converter. <https://www.oanda.com/currency-converter/en/?from=XOF&to=USD&amount=5000>

b Not shown because of small numbers.

All the exposure variables (covariates) in the table above were included in the model and variables were mutually adjusted.

©2024 Cham B. et al.
